# Supplementary material for: Comparative chloroplast genomics: analyses including new sequences from the angiosperms Nuphar advena and Ranunculus macranthus
Source: Springer Nature journal article supplement (doi:10.1186/1471-2164-8-174), 2007-01-01

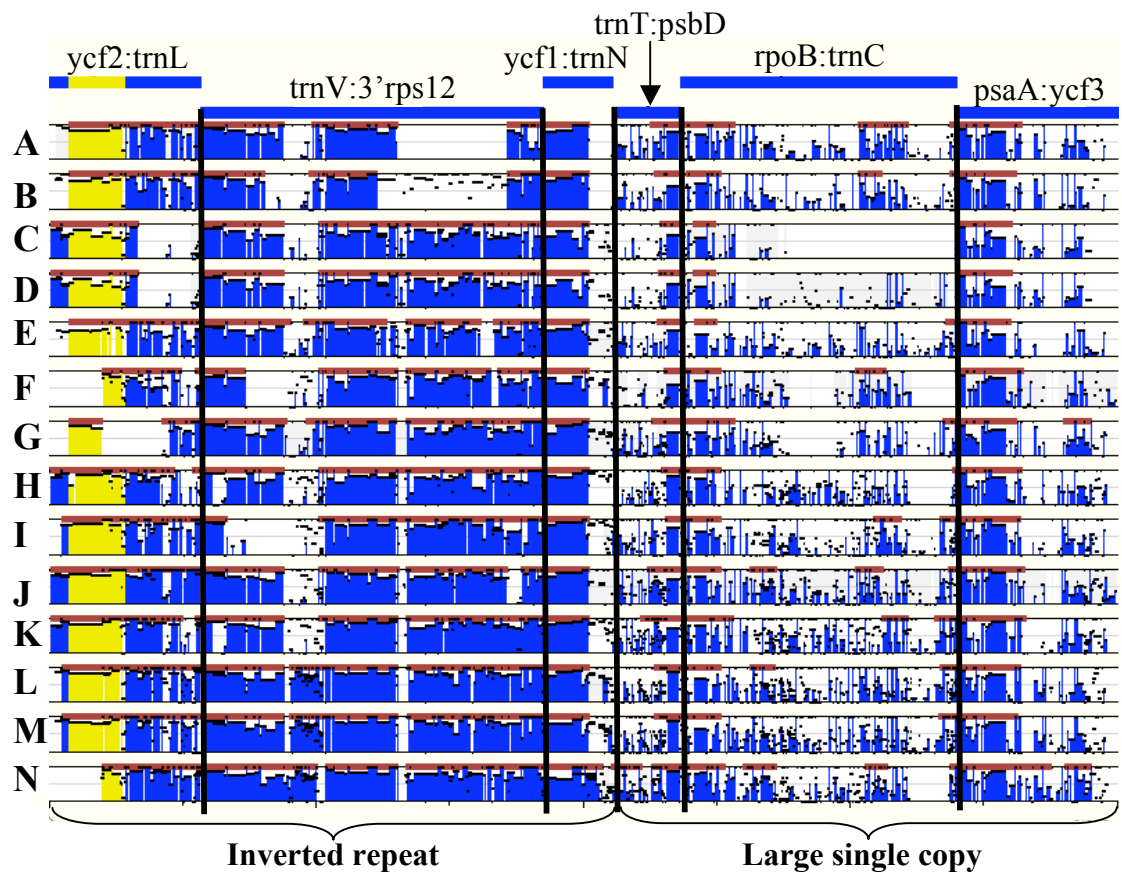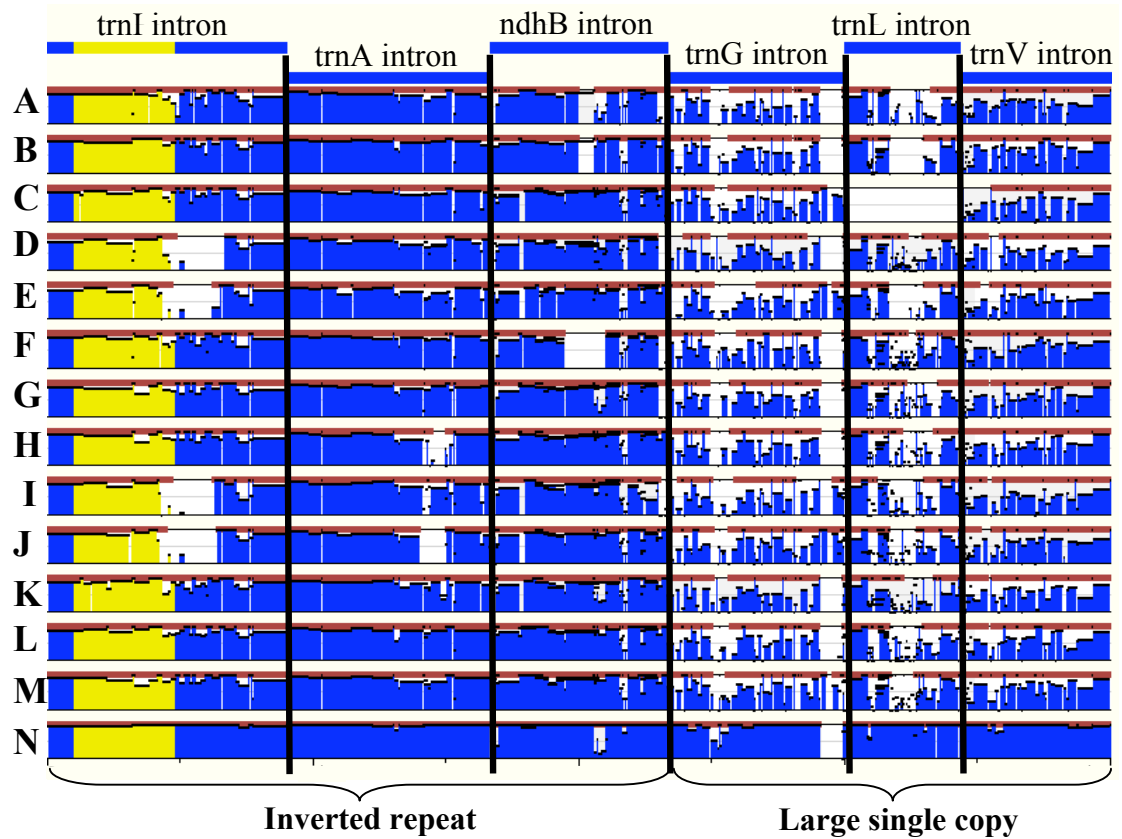

Supplement: 12864_2006_887_MOESM8_ESM.pdf [file 12864_2006_887_MOESM8_ESM.pdf]
