# Supplementary material for: Comparative chloroplast genomics: analyses including new sequences from the angiosperms Nuphar advena and Ranunculus macranthus
Source: Springer Nature journal article supplement (doi:10.1186/1471-2164-8-174), 2007-01-01

Nuphar: COA (RSCU) 59 degenerate codons

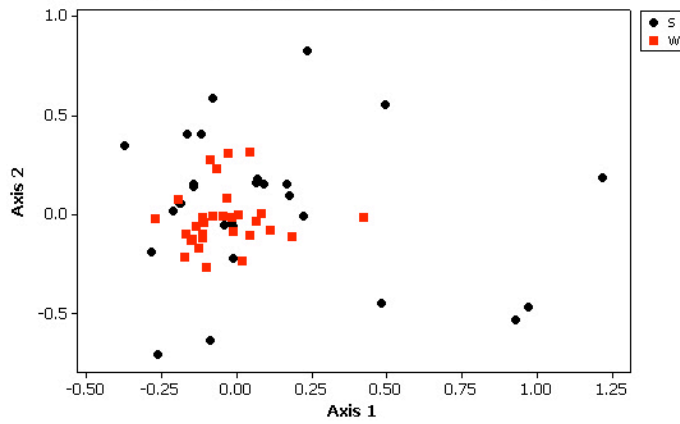

Ranunculus: COA (RSCU) 59 degenerate codons

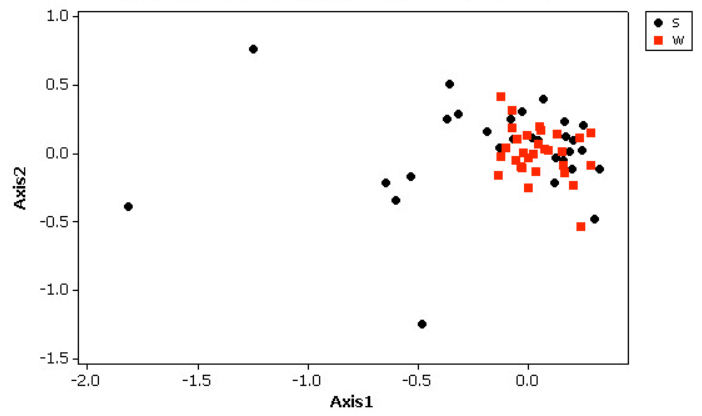

Nuphar: ENc vs. GC3

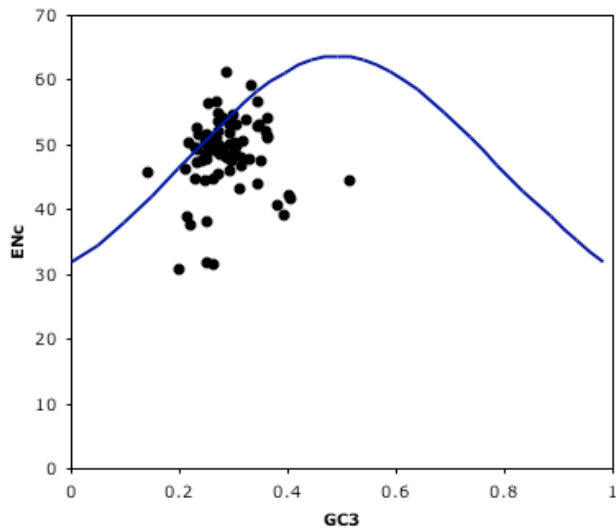

Ranunculus: ENc vs. GC3

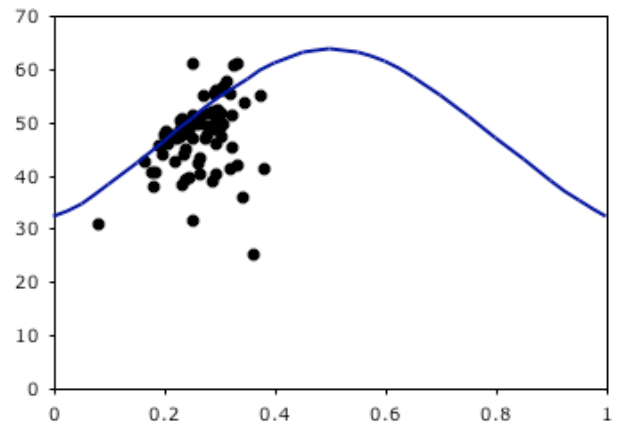

Nuphar: COA (CU) 79 protein-coding genes

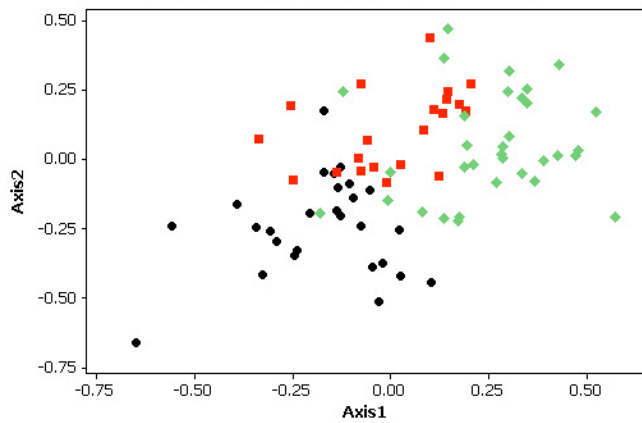

Ranunculus: COA (CU) 79 protein-coding genes

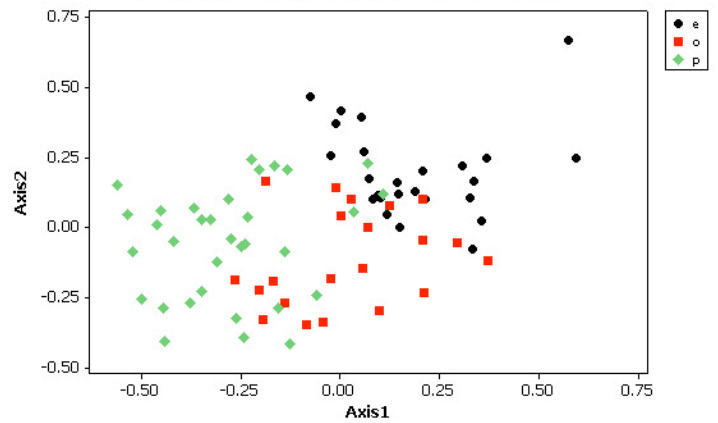

Supplement: 12864_2006_887_MOESM9_ESM.pdf [file 12864_2006_887_MOESM9_ESM.pdf]
